# Supplementary material for: Revealing the supramolecular features of two Zn(ii) complexes derived from a new hydrazone ligand: a combined crystallographic, theoretical and antibacterial study
Source: Royal Society of Chemistry journal article supplement (doi:10.1039/d2ce01445a), 2022-12-19
Supplement: d2ce01445a1.pdf [file d2ce01445a1.pdf]

## Supporting Information

### **Revealing the supramolecular features of two Zn(II) complexes derived from a new hydrazone ligand: A combined crystallographic, theoretical and antibacterial studies**

Samit Pramanik<sup>a</sup>, Anowar Hossain<sup>a</sup>, Sudipta Pathak<sup>\*,b</sup>, Sougata Ghosh Chowdhury<sup>c</sup>, Parimal Karmakar<sup>c</sup>, Antonio Frontera<sup>\*,d</sup>, Subrata Mukhopadhyay<sup>a</sup>

<sup>a</sup>Department of Chemistry, Jadavpur University, Kolkata 700032, India

<sup>b</sup>Department of Chemistry, Haldia Government College, Debhog, Purba Medinipur 721657, West Bengal, India

<sup>c</sup>Department of Life Science and Biotechnology, Jadavpur University, Kolkata 700032, India

<sup>d</sup>Departament de Química, Universitat de les Illes Balears, Crta. de Valldemossa km 7.5, 07122 Palma de Mallorca (Balears), Spain

E-mail: sudiptachemster@gmail.com (SP), toni.frontera@uib.es (AF)

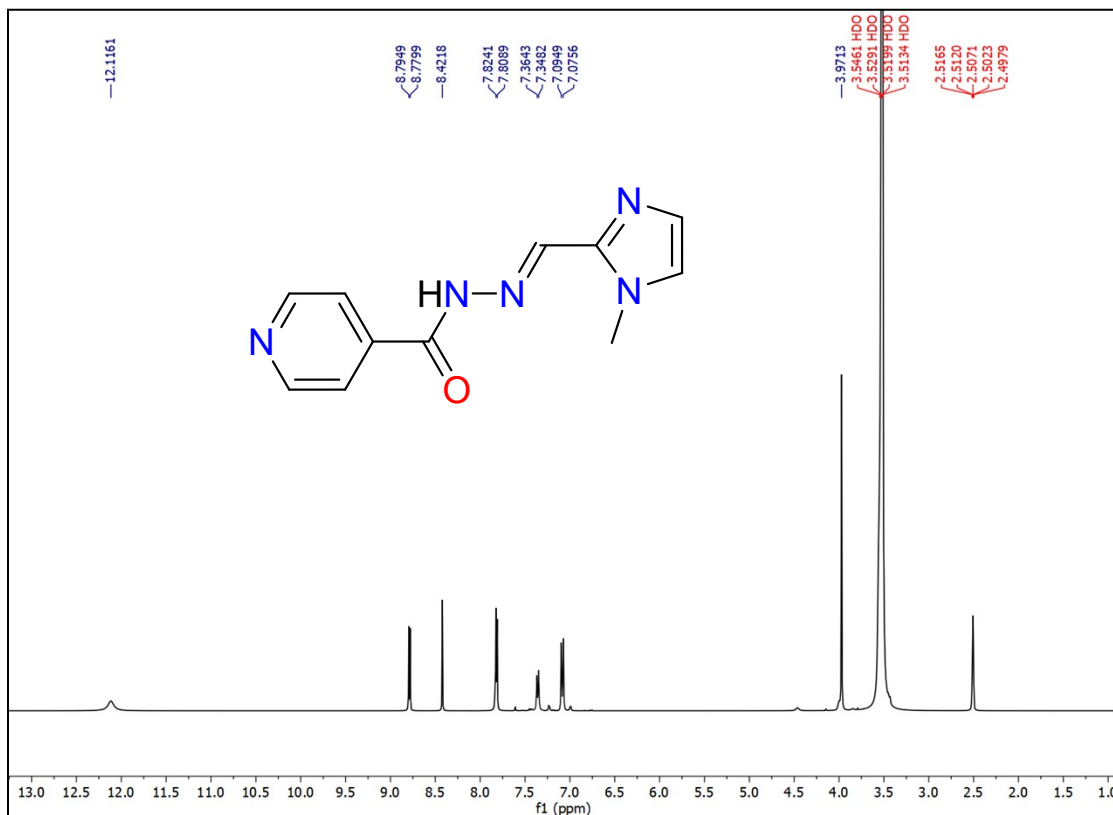

Fig. S1 <sup>1</sup>H NMR spectrum of HL

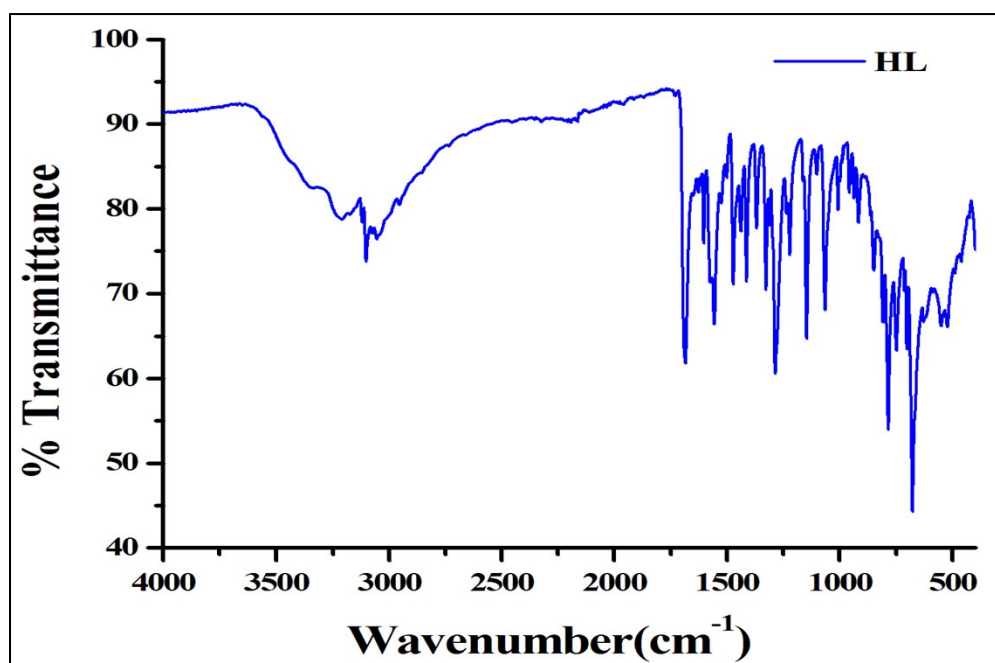

Fig. S2 FT-IR spectrum of HL

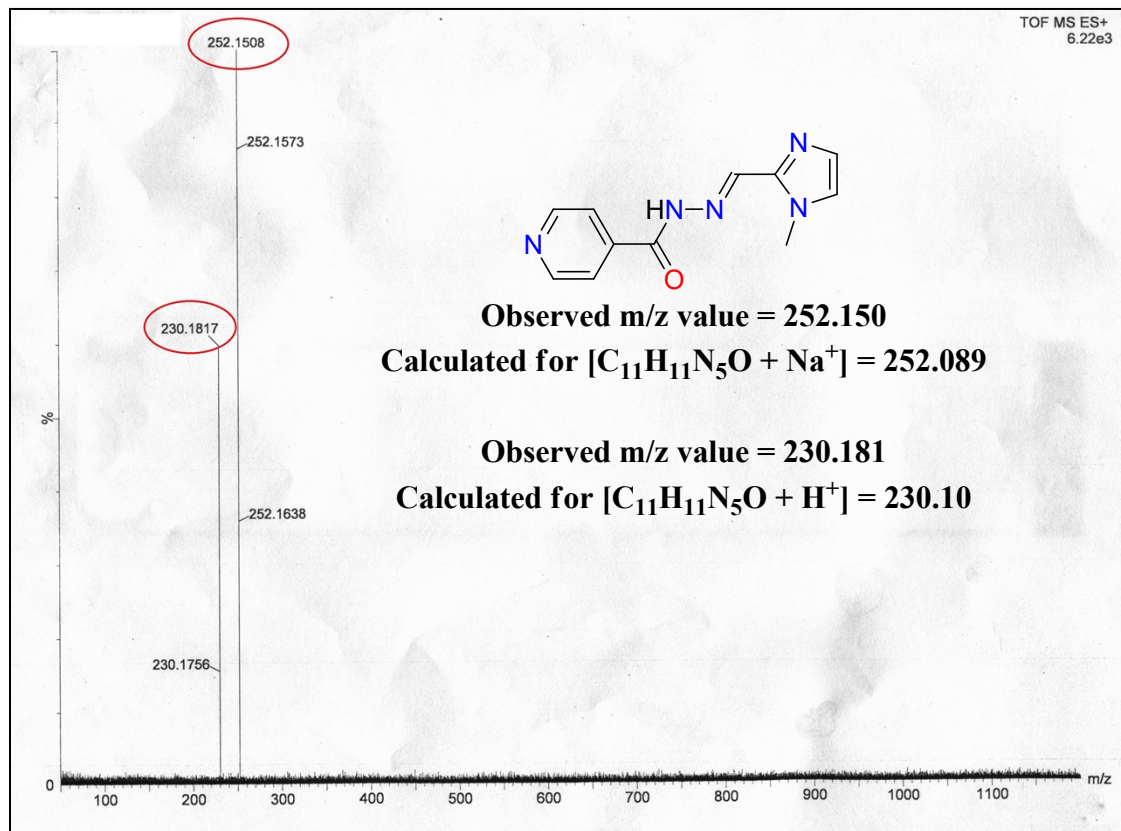

Fig. S3 ESI mass spectrum of HL

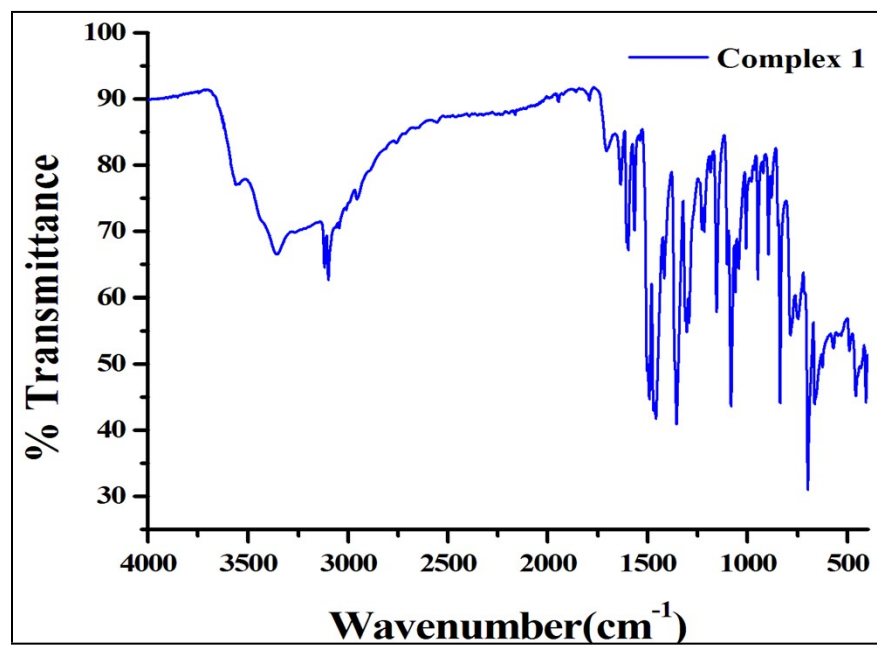

Fig. S4 FT-IR spectrum of complex 1

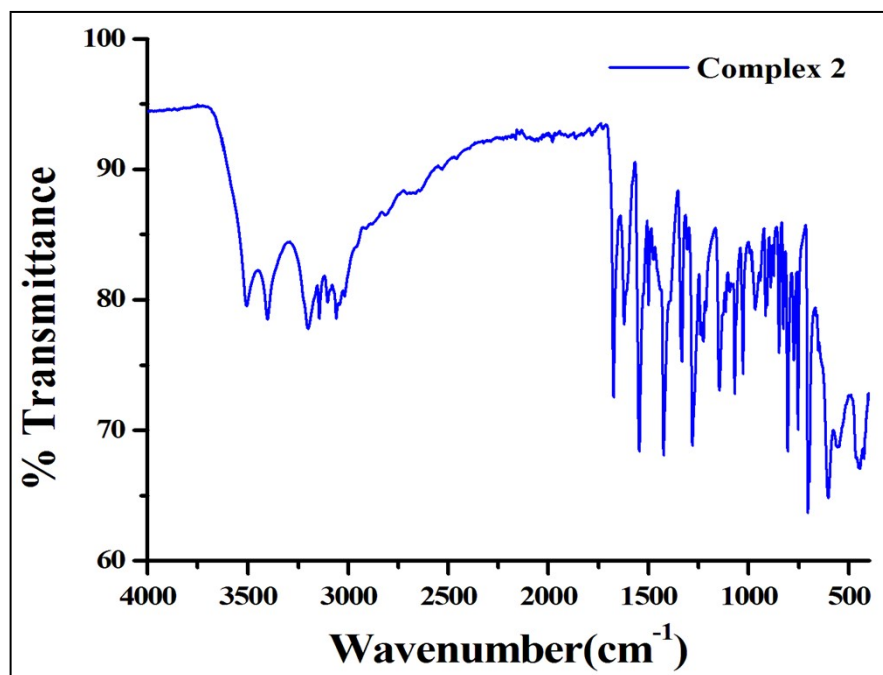

Fig. S5 FT-IR spectrum of complex 2

Table S1 Crystal Data and Structure Refinement Parameters for Complexes 1 and 2

| Structure                                     | Complex 1                           | Complex 2                         |
|-----------------------------------------------|-------------------------------------|-----------------------------------|
| Empirical formula                             | $C_{22}H_{28}N_{10}O_6Zn$           | $C_{11}H_{14}Cl_3N_5O_2Zn$        |
| Formula Weight                                | 593.93                              | 420.01                            |
| Temperature (K)                               | 296                                 | 296                               |
| Wavelength (Å)                                | 0.71073                             | 0.71073                           |
| Crystal system                                | Monoclinic                          | Monoclinic                        |
| space group                                   | $C2/c$                              | $P 21/c$                          |
| a, b, c (Å)                                   | 23.393(5), 8.6036(19),<br>13.597(3) | 9.473(4), 13.927(6),<br>13.293(5) |
| $\alpha, \beta, \gamma$ (°)                   | 90, 107.497(7), 90                  | 90, 105.063(5), 90                |
| Volume (Å <sup>3</sup> )                      | 2610.0(10)                          | 1693.5(12)                        |
| Z / Density (calc.)<br>(Mg/m <sup>3</sup> )   | 4 / 1.512                           | 4 / 1.647                         |
| Absorption coefficient<br>(mm <sup>-1</sup> ) | 0.999                               | 1.935                             |

|                                                  |                                                   |                                                   |
|--------------------------------------------------|---------------------------------------------------|---------------------------------------------------|
| F(000)                                           | 1232                                              | 848                                               |
| Crystal size (mm <sup>3</sup> )                  | 0.08 × 0.14 × 0.19                                | 0.09 × 0.13 × 0.19                                |
| θ range for data collection                      | 1.833 to 27.169                                   | 2.158 to 27.842                                   |
| Completeness to θ (%)                            | 100%                                              | 100%                                              |
| Absorption correction                            | Multi-scan                                        | Multi-scan                                        |
| Max. and min. transmission                       | 0.923 and 0.845                                   | 0.840 and 0.747                                   |
| Refinement method                                | Full-matrix least-squares on F <sup>2</sup>       | Full-matrix least-squares on F <sup>2</sup>       |
| Data/parameters                                  | 2933 / 184                                        | 4022 / 203                                        |
| Goodness-of-fit on F <sup>2</sup>                | 0.972                                             | 0.971                                             |
| Final R indices [I > 2σ(I)]                      | R <sub>1</sub> = 0.0363, wR <sub>2</sub> = 0.0842 | R <sub>1</sub> = 0.0346, wR <sub>2</sub> = 0.0715 |
| R indices (all data)                             | R <sub>1</sub> = 0.0573, wR <sub>2</sub> = 0.0880 | R <sub>1</sub> = 0.0608, wR <sub>2</sub> = 0.0804 |
| Largest diff. peak and hole (e.Å <sup>-3</sup> ) | 0.387 and -0.353                                  | 0.273 and -0.339                                  |

$R_1 = \sum ||F_o| - |F_c|| / \sum |F_o|$ ,  $wR_2 = [\sum \{(F_o^2 - F_c^2)^2\} / \sum \{w(F_o^2)^2\}]^{1/2}$ ,  $w = 1 / \{\sigma^2(F_o^2) + (aP)^2 + bP\}$ ,  $P = (F_o^2 + 2F_c^2) / 3$  where, a = 0.0511, b = 0.0 for complex **1** and a = 0.0339, b = 0.6250 for complex **2**

**Table S2 Selected Bond Distances [Å] for Complexes 1 and 2**

|           | Bonds   | Distance (Å) | Bonds    | Distance (Å) |
|-----------|---------|--------------|----------|--------------|
| Complex 1 | Zn1—O1  | 2.1877(15)   | Zn1—O1 a | 2.1877(15)   |
|           | Zn1—N2  | 2.1806(17)   | Zn1—N2 a | 2.1806(17)   |
|           | Zn1—N3  | 2.0971(17)   | Zn1—N3 a | 2.0971(17)   |
| Complex 2 | Zn1—Cl1 | 2.2165(13)   | Zn1—Cl3  | 2.2583(12)   |
|           | Zn1—Cl2 | 2.2873(12)   | Zn1—N5   | 2.068(2)     |

a = 1-x,y,3/2-z

**Table S3 Selected Bond Angles [°] for Complexes 1 and 2**

|           | Bond angles | Value (°) | Bond angles   | Value (°) |
|-----------|-------------|-----------|---------------|-----------|
| Complex 1 | O1—Zn1—N2   | 149.17(6) | N2—Zn1—N3 a   | 109.20(6) |
|           | O1—Zn1—N3   | 72.42(6)  | O1 a—Zn1—N3   | 101.52(6) |
|           | O1—Zn1—O1 a | 97.64(5)  | N2 a—Zn1—N3   | 109.20(6) |
|           | O1—Zn1—N2 a | 89.26(6)  | N3—Zn1—N3 a   | 171.09(6) |
|           | O1—Zn1—N3 a | 101.52(6) | O1 a—Zn1—N2 a | 149.17(6) |

|           |             |           |               |           |
|-----------|-------------|-----------|---------------|-----------|
|           | N2—Zn1—N3   | 76.76(6)  | O1_a—Zn1—N3_a | 72.42(6)  |
|           | O1_a—Zn1—N2 | 89.26(6)  | N2_a—Zn1—N3_a | 76.76(6)  |
|           | N2—Zn1—N2_a | 100.07(6) |               |           |
| Complex 2 | Cl1—Zn1—Cl2 | 110.54(3) | Cl2—Zn1—Cl3   | 109.01(3) |
|           | Cl1—Zn1—Cl3 | 119.21(3) | Cl2—Zn1—N5    | 101.88(6) |
|           | Cl1—Zn1—N5  | 110.26(6) | Cl3—Zn1—N5    | 104.41(6) |

a = 1-x,y,3/2-z

**Table S4 Geometrical Parameters for the Hydrogen Bonds of Complexes 1 and 2**

| D—H···A      | D—H [Å] | H···A  | D···A [Å] | D—H···A [°] | Symmetry         |
|--------------|---------|--------|-----------|-------------|------------------|
| Complex 1    |         |        |           |             |                  |
| O2—H2A···N5  | 0.8500  | 1.9900 | 2.832(2)  | 169.00      | —                |
| O2—H2B···O1  | 0.8500  | 2.0600 | 2.859(2)  | 157.00      | x,1-y,-1/2+z     |
| O3—H3A···O2  | 0.8500  | 2.1700 | 2.993(3)  | 162.00      | 1/2-x,1/2-y,-z   |
| O3—H3B···O2  | 0.8500  | 2.0800 | 2.920(3)  | 171.00      | —                |
| C2—H2···O3   | 0.9300  | 2.5800 | 3.476(3)  | 163.00      | 1-x,2-y,1-z      |
| Complex 2    |         |        |           |             |                  |
| O2—H2A···O1  | 0.8500  | 2.0500 | 2.879(3)  | 167.00      | -1+x,y,z         |
| O2—H2A···N3  | 0.8500  | 2.4700 | 2.982(3)  | 120.00      | -1+x,y,z         |
| O2—H2B···Cl3 | 0.8500  | 2.5000 | 3.347(3)  | 175.00      | 1-x,-1/2+y,3/2-z |
| N2—H2C···O2  | 0.8600  | 1.9700 | 2.821(3)  | 173.00      | 1+x,y,z          |
| N4—H4C···Cl2 | 0.8600  | 2.5100 | 3.303(3)  | 154.00      | 1-x,-1/2+y,3/2-z |
| C5—H5···Cl2  | 0.9300  | 2.7200 | 3.526(3)  | 145.00      | 1-x,-1/2+y,3/2-z |

**Table S5 Geometrical Parameters (Å, °) for the  $\pi$ -Stacking Interactions for the Title Complexes**

| Cg(i)⋯Cg(j)      | Cg(i)⋯Cg(j)[Å] | $\alpha$ (°) | $\beta$ (°) | $\gamma$ (°) | Cg(i)–perp[Å] | Cg(j)–perp[Å] | Symmetry         |
|------------------|----------------|--------------|-------------|--------------|---------------|---------------|------------------|
| <b>Complex 1</b> |                |              |             |              |               |               |                  |
| Cg(1)[1]⋯Cg(6)   | 3.8699(14)     | 5.38         | 34.13       | 29.52        | 3.367         | 3.203         | 1-x,1-y,1-z      |
| Cg(3)[1]⋯Cg(6)   | 3.8699(14)     | 5.38         | 34.13       | 29.52        | 3.367         | 3.203         | x,1-y,1/2+z      |
| Cg(5)[1]⋯Cg(6)   | 3.8786(14)     | 11.45        | 25.24       | 36.36        | 3.123         | 3.508         | 1-x,2-y,1-z      |
| Cg(6)[1]⋯Cg(1)   | 3.8699(14)     | 5.38         | 29.52       | 34.13        | 3.203         | 3.368         | 1-x,1-y,1-z      |
| Cg(6)[1]⋯Cg(3)   | 3.8699(14)     | 5.38         | 29.52       | 34.13        | 3.203         | 3.368         | x,1-y,-1/2+z     |
| Cg(6)[1]⋯Cg(5)   | 3.8786(14)     | 11.45        | 36.36       | 25.24        | 3.508         | 3.123         | 1-x,2-y,1-z      |
| <b>Complex 2</b> |                |              |             |              |               |               |                  |
| Cg(1)[1]⋯Cg(2)   | 3.710(2)       | 8.41         | 29.78       | 21.63        | 3.448         | 3.220         | 2-x,-1/2+y,3/2-z |
| Cg(2)[1]⋯Cg(1)   | 3.710(2)       | 8.41         | 21.63       | 29.78        | 3.220         | 3.448         | 2-x,1/2+y,3/2-z  |

Cg(i) and Cg(j) denotes centroid of  $i^{\text{th}}$  and  $j^{\text{th}}$  ring respectively. For Complex 1: Cg(1) is the centroid of [Zn1/O1/C6/N4/N3] ring; Cg(3) is the centroid of [Zn1/O1\_a/C6\_a/N4\_a/N3\_a] ring; Cg(5) is the centroid of [N1/C2/C3/N2/C4] ring; and Cg(6) is the centroid of [N5/C9/C8/C7/C11/C10] ring. For Complex 2: Cg(1) is the centroid of [N1/C2/C3/N2/C4] ring and Cg(2) is the centroid of [N5/C9/C8/C7/C11/C10] ring.

**Table S6. Geometrical Parameters (Å,°) for the O–H⋯ $\pi$  Interaction for the Complex 1**

|           | X–H(I)⋯Cg(J)        | H⋯Cg | X⋯Cg     | X–H⋯Cg | Symmetry     |
|-----------|---------------------|------|----------|--------|--------------|
| Complex 1 | O(2)H(2B)–[2]⋯Cg(2) | 2.93 | 3.343(2) | 112    | 1-x,1-y,1-z  |
|           | O(2)H(2B)–[2]⋯Cg(4) | 2.93 | 3.343(2) | 112    | x,1-y,-1/2+z |

For Complex 1: Cg(2) is the centroid of [Zn1/N2/C4/C5/N3] ring and Cg(4) is the centroid of [Zn1/N2\_a/C4\_a/C5\_a/N3\_a] ring.

**Table S7. Geometrical Parameters ( $\text{\AA}$ ,  $^\circ$ ) for the Anion $\cdots\pi$ /Lone Pair $\cdots\pi$  Interactions for the Complex 2**

|           | Y–X(I) $\cdots$ Cg(J)         | X $\cdots$ Cg [ $\text{\AA}$ ] | Y $\cdots$ Cg [ $\text{\AA}$ ] | Y–X $\cdots$ Cg ( $^\circ$ ) | Symmetry    |
|-----------|-------------------------------|--------------------------------|--------------------------------|------------------------------|-------------|
| Complex 2 | Zn(1)–Cl(3)[1] $\cdots$ Cg(2) | 3.608(2)                       | 4.622(2)                       | 101.49(3)                    | 1-x,2-y,1-z |
|           | C(6)–O(1)[1] $\cdots$ Cg(1)   | 3.186(3)                       | 3.320(3)                       | 85.49(15)                    | 2-x,1-y,1-z |

For Complex 2: Cg(1) is the centroid of [N1/C2/C3/N2/C4] ring and Cg(2) is the centroid of [N5/C9/C8/C7/C11/C10] ring.

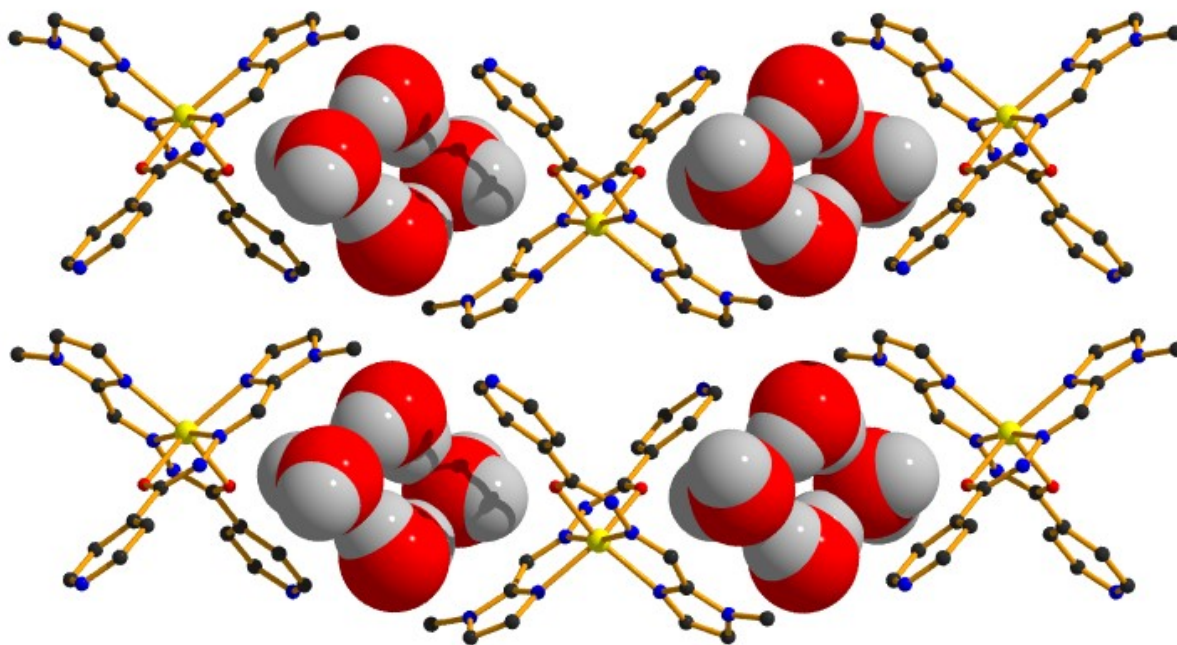

**Fig. S6** Filling of void spaces through water cluster present in complex 1
